# Supplementary material for: HIF‐1α is necessary for activation and tumour‐promotion effect of cancer‐associated fibroblasts in lung cancer
Source: PubMed Central journal article supplement (PMC8184678; doi:10.1111/jcmm.16556), 2021-05-04
Supplement: JCMM-25-5457-s004.pdf [file JCMM-25-5457-s004.pdf]

A

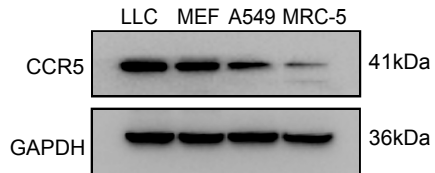

B

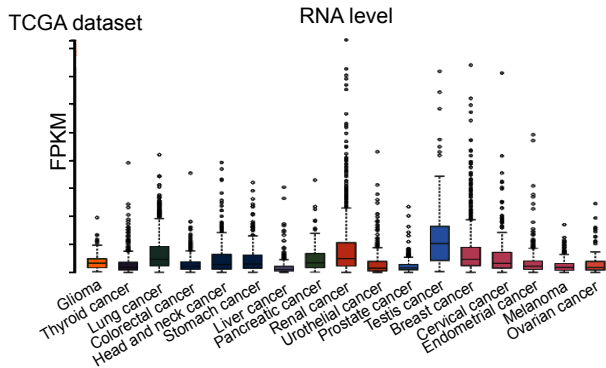

FIGURE S4
